# Supplementary material for: Systems-Scale Analysis Reveals Pathways Involved in Cellular Response to Methamphetamine
Source: PLoS One. 2011 Apr 20;6(4):e18215. doi: 10.1371/journal.pone.0018215 (PMC3080363; doi:10.1371/journal.pone.0018215)
Supplement: Table S1 — Pathways are ranked by the number of proteins represented on protein chips and the number of genes represented on microarray. (XLS) [file pone.0018215.s008.xls]

## Sheet: comparison
Table S1. Pathways are ranked by the number of proteins represented on protein chips and the number of genes represented on microarray.
PATHWAY ID	PATHWAY NAME	Pathway Genes	# Represented on protein chip	# Represented on Microarrays	Total # represented	ATPsyn-beta	ATPsyn-d	Adh	Argk	CG11015	CG3544	CG7998	Cyp4d8	Dhc98D	Dip-B	Eno	Gapdh1	proteinchip-final2_Gpdh	GstS1	Iap2	ND42	Pglym78	PyK	Vha55	awd	blw	porin	Acox57D-p	Adgf-D	CG10184	CG10827	CG11200	CG11598	CG11608	CG11919	CG12116	CG15116	CG2781	CG31075	CG31233	CG33138	CG33173	CG33970	CG4302	CG4592	CG4753	CG5224	CG5724	CG5966
path:dme00903	Limonene and pinene degradation	106	1	16	17								¯																									¯	­
path:dme00361	gamma-Hexachlorocyclohexane degradation	100	1	14	15								¯																		¯
path:dme00980	Metabolism of xenobiotics by cytochrome P450	71	2	13	15			¯											­																									­			­	­
path:dme00982	Drug metabolism - cytochrome P450	73	2	13	15			¯											­																									­			­	­
path:dme00626	Naphthalene and anthracene degradation	71	1	13	14								¯
path:dme00480	Glutathione metabolism	72	2	10	12										­				­																		¯			¯							­
path:dme00010	Glycolysis / Gluconeogenesis	54	9	2	11			¯								­	­					¯	¯																­
path:dme00230	Purine metabolism	306	5	5	10									¯									¯		¯				­						­							¯	¯
path:dme00500	Starch and sucrose metabolism	66	0	8	8																																	¯			¯			­				­
path:dme00983	Drug metabolism - other enzymes	77	0	8	8																																							­				­
path:dme00190	Oxidative phosphorylation	137	8	0	8	­	¯			­											­			¯		­
path:dme00053	Ascorbate and aldarate metabolism	34	0	7	7																																		­					­				­
path:dme00040	Pentose and glucuronate interconversions	41	1	6	7						­																																	­				­
path:dme00830	Retinol metabolism	37	1	6	7			¯																																				­				­
path:dme00564	Glycerophospholipid metabolism	102	2	5	7													­¯																				¯								¯
path:dme00150	Androgen and estrogen metabolism	35	0	6	6																																							­				­
path:dme00561	Glycerolipid metabolism	83	0	6	6																												¯	¯					­							¯			­
path:dme00860	Porphyrin and chlorophyll metabolism	47	0	6	6																																							­				­
path:dme00590	Arachidonic acid metabolism	23	0	4	4																											¯					¯
path:dme00071	Fatty acid metabolism	41	1	3	4			¯																				­											­						¯
path:dme00620	Pyruvate metabolism	48	4	0	4							­											¯
path:dme00260	Glycine, serine and threonine metabolism	42	0	3	3																									¯
path:dme01040	Biosynthesis of unsaturated fatty acids	13	0	3	3																							­
path:dme00350	Tyrosine metabolism	67	1	2	3			¯																														¯
path:dme00624	1- and 2-Methylnaphthalene degradation	41	1	2	3			¯																														¯
path:dme00280	Valine, leucine and isoleucine degradation	38	0	2	2																							­											­
path:dme00310	Lysine degradation	35	0	2	2																																		­
path:dme00360	Phenylalanine metabolism	63	0	2	2																																	¯
path:dme00410	beta-Alanine metabolism	23	0	2	2																							­											­
path:dme00565	Ether lipid metabolism	33	0	2	2																																									¯
path:dme00592	alpha-Linolenic acid metabolism	27	0	2	2																							­
path:dme00600	Sphingolipid metabolism	27	0	2	2
path:dme00632	Benzoate degradation via CoA ligation	54	0	2	2																																	¯
path:dme00640	Propanoate metabolism	28	0	2	2																							­											­
path:dme00642	Ethylbenzene degradation	33	0	2	2																																	¯
path:dme00780	Biotin metabolism	5	0	2	2
path:dme00790	Folate biosynthesis	31	0	2	2																										¯					¯
path:dme00981	Insect hormone biosynthesis	9	0	2	2
path:dme00020	Citrate cycle (TCA cycle)	43	1	0	1							­
path:dme00120	Bile acid biosynthesis	17	1	0	1			¯
path:dme00240	Pyrimidine metabolism	83	1	0	1																				¯
path:dme00330	Arginine and proline metabolism	45	1	0	1				­
path:dme00630	Glyoxylate and dicarboxylate metabolism	17	1	0	1							­
path:dme00641	3-Chloroacrylic acid degradation	10	1	0	1			¯
path:dme00720	Reductive carboxylate cycle (CO2 fixation)	15	1	0	1							­
path:dme04020	Calcium signaling pathway	44	1	0	1																						¯
path:dme04120	Ubiquitin mediated proteolysis	91	1	0	1															­
path:dme04210	Apoptosis	23	1	0	1															­
­ stands for up-regulated
¯ stands for down-regulated
highlight pathway stands for existing in both protein chip and microarray
[truncated: 43 more columns]
