# Supplementary material for: Systems-Scale Analysis Reveals Pathways Involved in Cellular Response to Methamphetamine
Source: PLoS One. 2011 Apr 20;6(4):e18215. doi: 10.1371/journal.pone.0018215 (PMC3080363; doi:10.1371/journal.pone.0018215)
Supplement: Table S3 — Drosophila melanogaster genes and human gene orthologs were compared using David annotation software. (XLS) [file pone.0018215.s010.xls]

## Sheet: table S4
Table S3. Drosophila melanogaster genes and human gene orthologs were compared using David annotation software.
Common processes among humans and Drosophila	Genes (Entrez_GeneID)
glycolysis	31532, 33351, 33824, 35728, 42185, 42620, 43447
biotin metabolism	31551, 32095
steroid metabolism	53507, 53511
oxidative phosphorylation	42591, 43829, 37617, 42291, 41550
pyruvate metabolism	42620, 42185
lipid metabolism	33824, 33839
amino acid metabolism	41561
apoptosis and survival	35748
citrate cycle	42185
starch and sucrose metabolism	53507, 326264
