# Supplementary material for: Systems-Scale Analysis Reveals Pathways Involved in Cellular Response to Methamphetamine
Source: PLoS One. 2011 Apr 20;6(4):e18215. doi: 10.1371/journal.pone.0018215 (PMC3080363; doi:10.1371/journal.pone.0018215)
Supplement: Table S4 — Potential transcription factor binding motifs (TFBMs) observed from over- and under-transcribed genes in w1118 Drosophila melanogaster adults treated with methamphetamine. (XLS) [file pone.0018215.s011.xls]

## Sheet: Sheet1
Table S4. Potential transcription factor binding motifs (TFBMs) observed from over- and under-transcribed genes in w1118 Drosophila melanogaster adults treated with methamphetamine
A: Potential TFBMs of up-regulated genes
Possible TFBM name a	Matrix Accession No.	Distance b	Abundance c	Function
YY1-like	M00059	0.07	0.61	Zinc finger proteins transcription factor; involved in histone modification [64].
GCNF-like	M00526	0.16	0.61	Nuclear receptor; involved in the regulation of embryogenesis and germ cell differentiation [65].
B: TFBMs of down-regulated genes
Possible TFBM name a	Matrix Accession No.	Distance b	Abundance c	Description
Crx-like	M00623	0.15	0.8	Photoreceptor-specific transcription factor; involved in differentiation of photoreceptor cells [66].
HES1-like	M01009	0.08	1	Hairy and enhancer of split 1 transcriptional repressor of genes (Strom et al., 1997).
AP-2rep-like	M00468	0.14	0.8	Kruppel-like zinc finger protein repressor; represses expression of the AP-2 alpha gene [67].
AhR-like	M00778	0.21	0.8	Cytosolic transcription factor- involved in cellular proliferation and differentiation [68], eliminate chemicals [69].
a The possible TFBM names were assigned based on the closest known motifs described in mammals.
b The distance is defined as a dissimilarity measurement between any pair of PWMs. The smaller number means the PWM was closer to the mammalian TFs. A distance of ≤ 0.1 shows that the TFBM names of Drosophila have a high similarity with the mammalian TFs.
c Abundance is the frequency that a motif presents in the given set of genes.
