# Supplementary material for: Systems-Scale Analysis Reveals Pathways Involved in Cellular Response to Methamphetamine
Source: PLoS One. 2011 Apr 20;6(4):e18215. doi: 10.1371/journal.pone.0018215 (PMC3080363; doi:10.1371/journal.pone.0018215)
Supplement: Table S6 — The lethal time 50 (LT50) of Drosophila mutants fed media containing methamphetamine. (XLS) [file pone.0018215.s013.xls]

## Sheet: Sheet1
Table S6. The lethal time 50 (LT50) of Drosophila mutants fed media containing methamphetamine.
Fly strains (BDSC#)	Gene/Protein disrupted	LT50 (h)	95% C. I. (h)	P value*
w1118 (control)	-------	119.9	108.51-135.07	-
23527	CG7796-PA	55.75	41.10-74.65	<0.05
10099	Giiispla2	58.65	52.70-65.82	<0.001
11307	CG11893	91.93	83.13-104.51	N.S.
18707	CG1942	93.35	80.06-114.55	N.S.
17876	GSTE1	94.52	88.10-102.59	N.S.
27839	CG14280	125.3	93.74-219.40	<0.05
* Comparisons were between the LT50s of control versus each of the mutant fly strains. N.S. stands for not significant. The LT50s and mutant comparisons were performed using SAS (Cary, NC).
