# Supplementary material for: Systems-Scale Analysis Reveals Pathways Involved in Cellular Response to Methamphetamine
Source: PLoS One. 2011 Apr 20;6(4):e18215. doi: 10.1371/journal.pone.0018215 (PMC3080363; doi:10.1371/journal.pone.0018215)
Supplement: Table S7 — The reverse and forward primers used for the qRT-PCR experiments. (XLS) [file pone.0018215.s014.xls]

## Sheet: table S6
Table S7. The reverse and forward primers used for the qRT-PCR experiments.
Gene name	primer sequences
Cyp28a5_L	CTCACTACTGCTTCATGCTGGA
Cyp28a5_R	GAAGACACCCCGTTCCCTAAAT
Cyp6w1_L	AGCCCATAGGGTTCTAGCCGG
Cyp6w1_R	CCATCGCCTCGGCATCAA
Cyp6a2_L	TTCACCACCGATGTGATTGGC
Cyp6a2_R	TCGGGCATCATGCGCATT
Cyp12d1_L	TCTGTCGGCTGTTTTACTCTGC
Cyp12d1_R	TCCTCGTTGAGTAGGGAATCCT
GstD2_L	TCTGTACTTCGACATGGGAACTC
GstD2_R	AGTGGACAGGATGGCAATGT
GstD4_L	GGAACCCTGCATGACTCCTT
GstD4_R	CGAAAGTGGAAACGCTGGA
Cyp6a8_L	ACGAACTGGCAAAGAATCCGGAC
Cyp6a8_R	TGGCGGCCATTCGATCCA
Jon25Bii_L	AGGCTCAGTACACCCACACC
Jon25Bii_R	ATCAGGTGCCAGAAGTCCAC
Jheh1_L	GTCGTGGAGTACTGGCGCGA
Jheh1_R	GGCCATCCGTGGAGCAGC
Cyp309a1_L	GAAAAGTTGCGCTCGGAGATAC
Cyp309a1_R	GGAGTAGTCAGTCGGAGCGATT
Spn2_L	GCCGCACATGATAGTGAACTG
Spn2_R	CTCCAGCTCTGATAGTCCATCG
CG11892_L	GCCCTAATGGAGAACAACCAAC
CG11892_R	CTCGAAATCAGGCAGAAGTTCC
CG13659_L	GACTGCATGCTGCTGGATTA
CG13659_R	ATGTCCAGCTCCTCTCTTCG
CG6908_L	ATCGAGGGAGAATTCCGAGT
CG6908_R	GCGAAGAGAACCGACTCATT
Ugt86Dd_L	GCCTGGAAAGCCAGCTAATGTG
Ugt86Dd_R	GGCGCGCTGCACATTCAT
CG11893_L	AGTTGGCTACAAGGGCAAGA
CG11893_R	GCTTTAACGGCCACAATCAT
CG5724_L	GAATGTCCTTCCGACAGCGCT
CG5724_R	TGCGTGGGAGGCGAAGAA
CG10514_L	CAATGCCTTGATGAACGATG
CG10514_R	CCAGCAGTCCCTTTCTATCG
Cyp6a17_L	GGAGGAGATTGGCAATGTGT
Cyp6a17_R	TACTTTCGCAGCGTTTCCAT
Cyp6d4_L	ATCCCGAGACCTATGATCCC
Cyp6d4_R	GATGATGGCCAGTTTGGAGT
Cyp9b2_L	CACCAAGCTGTTCGACTTCA
Cyp9b2_R	TAAATCGATCCGGGTCAAAC
1625042_at_L	GGCATTTCCCACTGTTAAGC
1625042_at_R	TGCTCATCAGATTGCTCGAC
actin-M-r-at_L	CCACAGGTATCGTGTTGGACTC
actin-M-r-at_R	CTGTAACCGCGCTCAGTAAGAA
