# Supplementary material for: Systems-Scale Analysis Reveals Pathways Involved in Cellular Response to Methamphetamine
Source: PLoS One. 2011 Apr 20;6(4):e18215. doi: 10.1371/journal.pone.0018215 (PMC3080363; doi:10.1371/journal.pone.0018215)
Supplement: Table S8 — Genes that were differentially transcribed (based on qRT–PCR) in w1118 Drosophila melanogaster adults after 5-day-old virgin male flies were exposed to a diet containing 0.6% methamphetamine, as compared with flies reared on control diet. (XLS) [file pone.0018215.s015.xls]

## Sheet: table S8
Table S8. Genes that were differentially expressed in the microarray experiments, based on FDR analysis, at the q < 10% levels in Drosophila melanogaster after 5-day-old flies were exposed to a diet containing 0.6% methamphetamine, as compared with flies reared on control diet.
Gene name		probe ID	*ratio	q-value (%)	Cytological map location
Monooxygenase activity (GO:0004497)
Cyp6w1		1634143_at	12.49	0	42A12
Cyp6a2		1626401_at	6.56	0	42D1
Cyp28a5		1629009_at	5.17	0	34E5
Cyp309a1		1626324_at	5.58	3.81	22F4-23A1
Cyp12d1-p		1633401_s_at	21.08	0	47D4
Cyp6a8		1640755_at	15.05	0	51D1
Cyp12d1-d		1639069_at	8.7	3.81	47D4
Cyp9b2		1635008_at	3.95	3.81	42F2
Cyp6d4		1630802_at	3.26	3.81	94C1
Cyp6a17		1628052_at	2.74	3.81	51D1
Cyp4e2		1627844_at	3.55	5.6	44D1
Cyp28d1		1633639_at	2.88	5.6	25C10
Cyp12a5		1629771_at	2.34	7.92	91F2-91F3
Transferase activity (GO:0016740)
	Glutatione S transferases (GO:0004364)
GstD4		1626253_at	7.63	5.6	87B8
GstD2		1630258_at	21.22	0	87B8
	Associated with responses to phenobarbital
GstD9		1636174_at	3.29	5.6	87B8
GstE1		1623256_at	2.8	5.6	55C6
	Associated with ATPases-beta in oxidative phosphorylation pathway
GstD5		1634152_at	3.63	9.51	87B8
GstE6		1625744_at	2.27	9.81	55C7
GstD10		1627890_at	2.53	9.81	87B8
	Glucuronosyltransferase activity (GO:0015020)
Ugt86Da		1624156_at	2.54	5.28	86D5
Ugt36Bc		1641191_s_at	3.48	5.6	36B1
Ugt36Ba		1629836_at	4.96	5.6	36B1
Ugt86Dd		1641481_at	6.94	0	86D4
	Associated with steroid metabolism [70]
CG5724		1638903_at	13.14	3.81	87C8
	Associated with steroid metabolism [70]
	Other transferase activities
CG10514		1638424_at	0.12	6.24	96C9
Transcription level protein binding (UniProtKB) associated with gene CG 11892
CG6188		1634551_at	4.24	5.6	87C5
	Methionine metabolic processing and folic acid binding (UniProtKB)
CG6704		1624067_at	1.92	5.6	50C20
	Sulfotransferase activity (UniProtKB database)
CG31974		1639359_at	2.52	5.28	21B3
Purine metabolism
ade3 (PUR2)		1637037_at	3.12	9.51	27D4
ade2		1629194_s_at	2.38	5.6	26B3
Oxidoreductase activity (GO:0016491)
CG9360		1624688_at	4.74	5.6	10E2
CG6385		1639819_at	3.07	9.81	54E8
CG1319		1641058_at	2.43	8.58	64B1
CG12766		1635410_at	3.66	5.28	64A1
CG2065		1630212_at	3.73	5.28
Catalytic activity (GO:0003824)
CG8693		1631806_at	3.79	5.6	44D1
Jheh1		1626414_at	4.65	3.81	55F7-55F8
alpha-Est2		1633196_at	1.94	9.51	84D9
Spn2		1631670_at	0.08	6.24	28F5
Jon25Bii		1639196_at	0.1	9.51	25B4
CG5966		1627287_at	3.45	5.6	5D1
Cation binding (GO:0043169)
GIIIspla2		1628080_at	2.39	8.58	7D16-7D17
		Calcium binding and phospholipase activity (UniProtKB database)
Genes that code for proteins with suspected functions and protein interactions
CG11893		1635512_at	14.97	0
Protein binding associated with BIN1 and MRph44, And, carbohydrates, visceral muscles, spermatogenesis, actin, DNA repair, and calmodulin dependent activities (iHOP, UniProtKB database ).
CG11892		1624892_s_at	0.2	6.24	96C9
Mef2		1626392_s_at	3.78	5.28
Transcription factor and developmental protein (BioGrid database)
CG33282		1625342_at	3.43	7.92
Monosaccharide transporter (UniProtKB database)
CG33514		1637346_at	3.23	8.58
		Transporter; Vitamin E binding activity (UniProtKB, BioGrid database)
CG10420)		1623247_at	2.52	9.51
Nucleotide exchange factor SIL1 protein transporter in ER (UniProtKB)
CG30287		1635548_s_at	2.74	9.51
serine-type protease (UniProtKB)
CG1942		1641125_at	5.62	5.6
Acyl-transferase activity, development of muscle, blood, and connective tissue (UniProtKB)
CG13673 s		1623872_at	6.07	5.6
Synonym CG42330 inmunoglobulin domain (UniProtKB)
CG13659		1633857_at	8.7	3.81
		Protein binding functions ((UniProtKB)
CG32984		1636449_at	12.73	5.6
		Metabolic processes and catalytic activity (UniProtKB)
CG6305		1629304_at	0.35	6.24
		Structural constituent of cuticle (UniProtKB)
Wnt10			0.08
Signal transducer activity; Wnt receptor signaling pathway, calcium modulating pathway (UniProtKB, BioGrid database)
Genes that code for proteins with currently unknown function
CG6908		1622946_at	9.87	0	86E16
CG31288		1625042_at	6.19	3.81	96D1
CG34040		1630800_s_at	3.19	5.6
CG40368		1633689_at	3.11	5.6
1626656_at		1626656_at	7.37	6.87
CG34040		1630568_at	3.32	8.58
CG13858		1629997_at	5.66	9.51
CG13170		1641602_at	12.92	9.51
1632766_at		1632766_at	4.89	9.81
1631854_s_at		1631854_s_at	21.54	9.81
CG13658		1638080_at	4.98	5.6
CG13615		1636397_at	3.77	5.6
CG10562		1638226_at	3.59	5.6
